# Supplementary material for: T2DM may exert a protective effect against digestive system tumors in East Asian populations: a Mendelian randomization analysis
Source: Front Oncol. 2024 Jun 14;14:1327154. doi: 10.3389/fonc.2024.1327154 (PMC11211363; doi:10.3389/fonc.2024.1327154)
Supplement: Supplementary file 11 [file Table_1.xlsx]

## Sheet: Supplemental Table 1
Supplemental Table 1. Assumption check for instrumental variables.
	ebi-a-GCST010118						bbj-a-77						bbj-a-153
outcome	N	F	IGX2	Q	Q'	RSS	N	F	IGX2	Q	Q'	RSS	N	F	IGX2	Q	Q'	RSS
Colorectal cancer	128	90.2	0.943	0.0523375	0.0491412	0.048	57	89.5	0.939	0.129191	0.120755	0.099	62	95	0.945	0.127925	0.11207	0.128
Esophageal cancer || id:bbj-a-117	128	90.2	0.943	0.00882261	0.0083368	0.01	57	89.5	0.939	0.00555639	0.00735952	0.006	62	95	0.945	0.00138584	0.00173794	<0.001
Gastric cancer || id:bbj-a-119	128	90.2	0.943	<0.001	<0.001	0.001	57	89.5	0.939	<0.001	<0.001	<0.001	62	95	0.945	<0.001	<0.001	0.001
Pancreatic cancer || id:bbj-a-140	128	90.2	0.943	0.13062	0.305577	0.166	57	89.5	0.939	0.160354	0.253465	0.125	62	95	0.945	0.114472	0.189081	0.133
hepatocellular carcinoma || id:bbj-a-158	128	90.2	0.943	0.123011	0.120554	0.099	57	89.5	0.939	0.00480604	0.00379889	0.003	62	95	0.945	<0.001	<0.001	0.001
N, number of instruments; F, F statistic; Q, P-value for the Q test from IVW; Q′, P-value for the Q′ test from MR-Egger; RSS, P-value for MR-PRESSO global test

## Sheet: Supplemental Table 2
Supplemental Table 2. Instrumental variables from ebi-a-GCST010118
	se.exposure	pval.exposure	pos.exposure	samplesize.exposure	beta.exposure	chr.exposure	id.exposure	SNP	effect_allele.exposure	other_allele.exposure	eaf.exposure	exposure	mr_keep.exposure	pval_origin.exposure	data_source.exposure	maf.exposure	fval
1	0.0067	1.68112e-11	214158986	433540	0.0451	1	ebi-a-GCST010118	rs340875	C	G	0.537	Type 2 diabetes || id:ebi-a-GCST010118	TRUE	reported	igd	0.537	25.7531
2	0.0079	5.04429e-11	229642499	433540	-0.0519	1	ebi-a-GCST010118	rs238763	A	T	0.3217	Type 2 diabetes || id:ebi-a-GCST010118	TRUE	reported	igd	0.6783	22.0428
3	0.0081	2.21106e-11	46249293	433540	-0.0542	1	ebi-a-GCST010118	rs59317019	CT	C	0.2932	Type 2 diabetes || id:ebi-a-GCST010118	TRUE	reported	igd	0.7068	21.319
4	0.0116	7.49376e-15	51191935	433540	-0.0902	1	ebi-a-GCST010118	rs11205766	A	T	0.0969	Type 2 diabetes || id:ebi-a-GCST010118	TRUE	reported	igd	0.9031	10.4392
5	0.008	7.38584e-12	177878933	433540	0.0548	1	ebi-a-GCST010118	rs532504	A	G	0.2133	Type 2 diabetes || id:ebi-a-GCST010118	TRUE	reported	igd	0.7867	17.6591
6	0.007	4.29596e-10	20688352	433540	-0.0437	1	ebi-a-GCST010118	rs60573766	T	C	0.3653	Type 2 diabetes || id:ebi-a-GCST010118	TRUE	reported	igd	0.6347	22.2574
7	0.0092	5.58856e-11	39944249	433540	0.0603	1	ebi-a-GCST010118	rs61779313	C	T	0.1506	Type 2 diabetes || id:ebi-a-GCST010118	TRUE	reported	igd	0.8494	12.8687
8	0.0087	5.40406e-10	64107893	433540	-0.054	1	ebi-a-GCST010118	rs2269245	A	G	0.1847	Type 2 diabetes || id:ebi-a-GCST010118	TRUE	reported	igd	0.8153	14.35
9	0.0071	1.83105e-14	45192080	433540	0.0544	2	ebi-a-GCST010118	rs12712928	C	G	0.4022	Type 2 diabetes || id:ebi-a-GCST010118	TRUE	reported	igd	0.5978	28.3618
11	0.0074	1.54917e-15	60586707	433540	0.059	2	ebi-a-GCST010118	rs243018	G	C	0.6656	Type 2 diabetes || id:ebi-a-GCST010118	TRUE	reported	igd	0.6656	27.3153
12	0.0072	1.525e-09	149568396	433540	-0.0435	2	ebi-a-GCST010118	rs4499362	T	C	0.361	Type 2 diabetes || id:ebi-a-GCST010118	TRUE	reported	igd	0.639	21.4272
13	0.0069	2.14684e-11	234303281	433540	0.0462	2	ebi-a-GCST010118	rs838720	G	C	0.4045	Type 2 diabetes || id:ebi-a-GCST010118	TRUE	reported	igd	0.5955	24.8133
14	0.0066	1.01111e-21	27730940	433540	0.0632	2	ebi-a-GCST010118	rs1260326	C	T	0.4562	Type 2 diabetes || id:ebi-a-GCST010118	TRUE	reported	igd	0.5438	36.6329
15	0.0116	2.54976e-17	630662	433540	0.0982	2	ebi-a-GCST010118	rs6731688	C	A	0.908	Type 2 diabetes || id:ebi-a-GCST010118	TRUE	reported	igd	0.908	10.8498
17	0.0087	1.01298e-11	170643788	433540	-0.0592	3	ebi-a-GCST010118	rs201018682	C	T	0.1838	Type 2 diabetes || id:ebi-a-GCST010118	TRUE	reported	igd	0.8162	15.6766
18	0.007	1.508e-31	63891105	433540	-0.0818	3	ebi-a-GCST010118	rs9870576	C	T	0.3521	Type 2 diabetes || id:ebi-a-GCST010118	TRUE	reported	igd	0.6479	41.1452
19	0.0072	1.34307e-11	123193270	433540	-0.0487	3	ebi-a-GCST010118	rs73856630	C	T	0.3338	Type 2 diabetes || id:ebi-a-GCST010118	TRUE	reported	igd	0.6662	23.1332
20	0.0073	1.40602e-09	152382352	433540	-0.0442	3	ebi-a-GCST010118	rs1850421	C	A	0.7223	Type 2 diabetes || id:ebi-a-GCST010118	TRUE	reported	igd	0.7223	18.6619
21	0.0067	3.11602e-09	186665645	433540	0.0397	3	ebi-a-GCST010118	rs3887925	T	C	0.4542	Type 2 diabetes || id:ebi-a-GCST010118	TRUE	reported	igd	0.5458	22.589
22	0.0088	2.69401e-37	23258614	433540	-0.1123	3	ebi-a-GCST010118	rs11926494	A	G	0.18	Type 2 diabetes || id:ebi-a-GCST010118	TRUE	reported	igd	0.82	29.0024
23	0.0088	7.29105e-09	187698333	433540	-0.0509	3	ebi-a-GCST010118	rs13086331	C	T	0.1813	Type 2 diabetes || id:ebi-a-GCST010118	TRUE	reported	igd	0.8187	13.178
24	0.007	3.34503e-25	23560197	433540	0.0726	3	ebi-a-GCST010118	rs58718028	T	C	0.3409	Type 2 diabetes || id:ebi-a-GCST010118	TRUE	reported	igd	0.6591	35.9303
25	0.007	3.73422e-11	114960798	433540	0.0463	3	ebi-a-GCST010118	rs1459513	C	A	0.6093	Type 2 diabetes || id:ebi-a-GCST010118	TRUE	reported	igd	0.6093	24.2214
27	0.0073	1.90678e-66	185495320	433540	0.1257	3	ebi-a-GCST010118	rs13092876	A	G	0.3122	Type 2 diabetes || id:ebi-a-GCST010118	TRUE	reported	igd	0.6878	57.2495
28	0.0076	1.546e-09	195830310	433540	0.0459	3	ebi-a-GCST010118	rs9866168	T	A	0.6394	Type 2 diabetes || id:ebi-a-GCST010118	TRUE	reported	igd	0.6394	21.409
29	0.0074	9.01156e-42	1254535	433540	-0.1002	4	ebi-a-GCST010118	rs7656416	T	C	0.3167	Type 2 diabetes || id:ebi-a-GCST010118	TRUE	reported	igd	0.6833	45.2624
30	0.0074	7.40116e-20	1413421	433540	-0.0675	4	ebi-a-GCST010118	rs62286764	A	T	0.6477	Type 2 diabetes || id:ebi-a-GCST010118	TRUE	reported	igd	0.6477	32.068
31	0.0085	2.92281e-16	1784211	433540	-0.0695	4	ebi-a-GCST010118	rs35503308	G	C	0.7264	Type 2 diabetes || id:ebi-a-GCST010118	TRUE	reported	igd	0.7264	25.0015
32	0.0083	4.64301e-16	71844118	433540	0.0674	4	ebi-a-GCST010118	rs28599782	A	G	0.209	Type 2 diabetes || id:ebi-a-GCST010118	TRUE	reported	igd	0.791	20.6366
33	0.0067	1.42594e-27	153520279	433540	-0.0729	4	ebi-a-GCST010118	rs10011838	A	G	0.507	Type 2 diabetes || id:ebi-a-GCST010118	TRUE	reported	igd	0.507	41.9826
34	0.0073	3.843e-10	45186139	433540	0.0457	4	ebi-a-GCST010118	rs10938398	A	G	0.2921	Type 2 diabetes || id:ebi-a-GCST010118	TRUE	reported	igd	0.7079	19.896
36	0.0066	3.55631e-29	55810305	433540	0.074	5	ebi-a-GCST010118	rs256904	T	A	0.4923	Type 2 diabetes || id:ebi-a-GCST010118	TRUE	reported	igd	0.5077	43.2709
37	0.0067	3.11602e-09	95843763	433540	0.0397	5	ebi-a-GCST010118	rs261982	T	C	0.414	Type 2 diabetes || id:ebi-a-GCST010118	TRUE	reported	igd	0.586	22.1041
38	0.0091	3.91796e-08	36187883	433540	0.05	5	ebi-a-GCST010118	rs117027183	A	G	0.1601	Type 2 diabetes || id:ebi-a-GCST010118	TRUE	reported	igd	0.8399	11.3366
39	0.0072	2.02395e-13	55818401	433540	0.0529	5	ebi-a-GCST010118	rs76878791	G	A	0.3219	Type 2 diabetes || id:ebi-a-GCST010118	TRUE	reported	igd	0.6781	24.6728
40	0.0069	2.216e-08	133864599	433540	0.0386	5	ebi-a-GCST010118	rs329122	A	G	0.3865	Type 2 diabetes || id:ebi-a-GCST010118	TRUE	reported	igd	0.6135	20.3899
41	0.0068	1.51008e-12	176513896	433540	0.0481	5	ebi-a-GCST010118	rs3135911	A	C	0.4324	Type 2 diabetes || id:ebi-a-GCST010118	TRUE	reported	igd	0.5676	26.719
42	0.0068	2.58702e-09	14768092	433540	-0.0405	5	ebi-a-GCST010118	rs6885132	G	C	0.444	Type 2 diabetes || id:ebi-a-GCST010118	TRUE	reported	igd	0.556	22.6103
43	0.0067	1.83502e-08	74574984	433540	-0.0377	5	ebi-a-GCST010118	rs2126736	G	A	0.5721	Type 2 diabetes || id:ebi-a-GCST010118	TRUE	reported	igd	0.5721	21.1768
44	0.0067	1.06292e-13	137293227	433540	-0.0498	6	ebi-a-GCST010118	rs2327777	C	T	0.5492	Type 2 diabetes || id:ebi-a-GCST010118	TRUE	reported	igd	0.5492	28.331
45	0.0069	2.34909e-18	20510461	433540	0.0603	6	ebi-a-GCST010118	rs9368194	C	G	0.5343	Type 2 diabetes || id:ebi-a-GCST010118	TRUE	reported	igd	0.5343	33.5117
46	0.007	1.15213e-43	20857925	433540	0.097	6	ebi-a-GCST010118	rs16884229	C	T	0.3345	Type 2 diabetes || id:ebi-a-GCST010118	TRUE	reported	igd	0.6655	47.6722
47	0.0085	1.98793e-12	31143241	433540	-0.0598	6	ebi-a-GCST010118	rs9461650	A	G	0.208	Type 2 diabetes || id:ebi-a-GCST010118	TRUE	reported	igd	0.792	17.8058
48	0.0093	1.23595e-16	31204694	433540	-0.077	6	ebi-a-GCST010118	rs3869115	G	C	0.1681	Type 2 diabetes || id:ebi-a-GCST010118	TRUE	reported	igd	0.8319	17.7883
49	0.0075	3.78504e-09	50787459	433540	0.0442	6	ebi-a-GCST010118	rs62405419	T	G	0.2682	Type 2 diabetes || id:ebi-a-GCST010118	TRUE	reported	igd	0.7318	17.7705
50	0.0083	6.35199e-09	143056556	433540	-0.0482	6	ebi-a-GCST010118	rs9390022	C	T	0.2003	Type 2 diabetes || id:ebi-a-GCST010118	TRUE	reported	igd	0.7997	14.2812
51	0.0067	4.9545e-183	20683164	433540	0.1933	6	ebi-a-GCST010118	rs9350271	A	G	0.4225	Type 2 diabetes || id:ebi-a-GCST010118	TRUE	reported	igd	0.5775	110.124
52	0.0075	4.58596e-08	7172221	433540	-0.041	6	ebi-a-GCST010118	rs55734389	G	C	0.3017	Type 2 diabetes || id:ebi-a-GCST010118	TRUE	reported	igd	0.6983	17.6938
53	0.0094	2.2009e-14	7231843	433540	-0.0718	6	ebi-a-GCST010118	rs9379084	A	G	0.2014	Type 2 diabetes || id:ebi-a-GCST010118	TRUE	reported	igd	0.7986	18.8785
54	0.0077	1.7869e-22	39046644	433540	-0.0751	6	ebi-a-GCST010118	rs742762	C	A	0.2882	Type 2 diabetes || id:ebi-a-GCST010118	TRUE	reported	igd	0.7118	30.8182
55	0.0112	6.45803e-16	34236973	433540	-0.0905	6	ebi-a-GCST010118	rs2780215	G	A	0.1082	Type 2 diabetes || id:ebi-a-GCST010118	TRUE	reported	igd	0.8918	11.965
56	0.0083	7.57356e-13	117996631	433540	-0.0595	6	ebi-a-GCST010118	rs80196932	C	T	0.2141	Type 2 diabetes || id:ebi-a-GCST010118	TRUE	reported	igd	0.7859	18.5343
57	0.0067	2.55976e-12	126964510	433540	0.0469	6	ebi-a-GCST010118	rs4273712	G	A	0.4688	Type 2 diabetes || id:ebi-a-GCST010118	TRUE	reported	igd	0.5312	26.8292
58	0.0068	4.41998e-09	131954879	433540	-0.0399	6	ebi-a-GCST010118	rs1206684	A	G	0.4799	Type 2 diabetes || id:ebi-a-GCST010118	TRUE	reported	igd	0.5201	22.5215
59	0.0072	1.75186e-19	15063923	433540	-0.065	7	ebi-a-GCST010118	rs10950550	G	T	0.3168	Type 2 diabetes || id:ebi-a-GCST010118	TRUE	reported	igd	0.6832	30.0925
60	0.0081	3.05211e-12	28219310	433540	-0.0565	7	ebi-a-GCST010118	rs3735567	A	G	0.2224	Type 2 diabetes || id:ebi-a-GCST010118	TRUE	reported	igd	0.7776	18.5356
61	0.0071	8.38301e-09	93107093	433540	-0.0409	7	ebi-a-GCST010118	rs2074120	C	A	0.677	Type 2 diabetes || id:ebi-a-GCST010118	TRUE	reported	igd	0.677	19.3589
62	0.0099	3.21514e-11	102336979	433540	-0.0657	7	ebi-a-GCST010118	rs75990271	C	T	0.1848	Type 2 diabetes || id:ebi-a-GCST010118	TRUE	reported	igd	0.8152	15.3524
63	0.0077	3.61826e-19	127229347	433540	0.0689	7	ebi-a-GCST010118	rs3735641	G	A	0.7395	Type 2 diabetes || id:ebi-a-GCST010118	TRUE	reported	igd	0.7395	26.5285
65	0.0067	1.66917e-12	157024510	433540	0.0473	7	ebi-a-GCST010118	rs1182444	G	A	0.4947	Type 2 diabetes || id:ebi-a-GCST010118	TRUE	reported	igd	0.5053	27.1626
66	0.0067	8.22811e-22	14898282	433540	0.0643	7	ebi-a-GCST010118	rs17168486	T	C	0.4181	Type 2 diabetes || id:ebi-a-GCST010118	TRUE	reported	igd	0.5819	36.001
67	0.0085	2.75994e-11	28259233	433540	0.0566	7	ebi-a-GCST010118	rs1513275	C	T	0.7836	Type 2 diabetes || id:ebi-a-GCST010118	TRUE	reported	igd	0.7836	17.346
68	0.008	1.52405e-15	89752238	433540	0.0638	7	ebi-a-GCST010118	rs39233	C	G	0.2231	Type 2 diabetes || id:ebi-a-GCST010118	TRUE	reported	igd	0.7769	21.2511
69	0.0109	1.57906e-55	127846470	433540	0.1711	7	ebi-a-GCST010118	rs35589574	T	C	0.1121	Type 2 diabetes || id:ebi-a-GCST010118	TRUE	reported	igd	0.8879	24.0336
70	0.0071	8.41783e-11	44174857	433540	0.0461	7	ebi-a-GCST010118	rs2908279	G	T	0.627	Type 2 diabetes || id:ebi-a-GCST010118	TRUE	reported	igd	0.627	23.3553
71	0.0068	2.25476e-15	13886654	433540	0.0539	7	ebi-a-GCST010118	rs7787720	T	C	0.4209	Type 2 diabetes || id:ebi-a-GCST010118	TRUE	reported	igd	0.5791	29.7528
72	0.007	6.95825e-22	69696905	433540	0.0673	7	ebi-a-GCST010118	rs12698877	G	A	0.3362	Type 2 diabetes || id:ebi-a-GCST010118	TRUE	reported	igd	0.6638	33.0636
74	0.0078	3.05098e-08	73503743	433540	0.0432	8	ebi-a-GCST010118	rs349359	C	A	0.2424	Type 2 diabetes || id:ebi-a-GCST010118	TRUE	reported	igd	0.7576	15.6194
76	0.0071	3.925e-09	126474405	433540	-0.0418	8	ebi-a-GCST010118	rs2980883	G	T	0.6312	Type 2 diabetes || id:ebi-a-GCST010118	TRUE	reported	igd	0.6312	21.0691
77	0.0072	6.41505e-09	95960886	433540	-0.0418	8	ebi-a-GCST010118	rs896852	T	G	0.7002	Type 2 diabetes || id:ebi-a-GCST010118	TRUE	reported	igd	0.7002	18.727
78	0.0071	7.51104e-10	36849946	433540	0.0437	8	ebi-a-GCST010118	rs4286946	G	C	0.3521	Type 2 diabetes || id:ebi-a-GCST010118	TRUE	reported	igd	0.6479	21.588
79	0.007	1.41599e-08	118049260	433540	0.0397	8	ebi-a-GCST010118	rs11426513	AT	A	0.5033	Type 2 diabetes || id:ebi-a-GCST010118	TRUE	reported	igd	0.5033	21.7995
80	0.0067	1.68112e-11	37391203	433540	-0.0451	8	ebi-a-GCST010118	rs4739515	C	G	0.4617	Type 2 diabetes || id:ebi-a-GCST010118	TRUE	reported	igd	0.5383	25.7429
81	0.0067	5.24928e-27	41506152	433540	0.0721	8	ebi-a-GCST010118	rs4736999	G	C	0.4525	Type 2 diabetes || id:ebi-a-GCST010118	TRUE	reported	igd	0.5475	41.1484
82	0.0067	3.72477e-67	118184783	433540	-0.116	8	ebi-a-GCST010118	rs13266634	T	C	0.4143	Type 2 diabetes || id:ebi-a-GCST010118	TRUE	reported	igd	0.5857	65.1493
86	0.0067	4.4157e-164	22132878	433540	-0.1829	9	ebi-a-GCST010118	rs10965248	C	T	0.437	Type 2 diabetes || id:ebi-a-GCST010118	TRUE	reported	igd	0.563	104.964
87	0.0123	4.51856e-26	139246588	433540	0.1299	9	ebi-a-GCST010118	rs376993806	G	A	0.8821	Type 2 diabetes || id:ebi-a-GCST010118	TRUE	reported	igd	0.8821	16.8712
89	0.0067	2.18102e-08	1032567	433540	0.0375	9	ebi-a-GCST010118	rs1016565	A	G	0.4209	Type 2 diabetes || id:ebi-a-GCST010118	TRUE	reported	igd	0.5791	20.9726
90	0.0067	4.46272e-27	4290085	433540	0.0722	9	ebi-a-GCST010118	rs4237150	C	G	0.4262	Type 2 diabetes || id:ebi-a-GCST010118	TRUE	reported	igd	0.5738	40.6711
91	0.0068	1.43087e-28	84308948	433540	-0.0754	9	ebi-a-GCST010118	rs2796441	A	G	0.6103	Type 2 diabetes || id:ebi-a-GCST010118	TRUE	reported	igd	0.6103	40.6994
92	0.0068	1.262e-08	136155444	433540	0.0387	9	ebi-a-GCST010118	rs633862	T	C	0.5422	Type 2 diabetes || id:ebi-a-GCST010118	TRUE	reported	igd	0.5422	21.7202
93	0.0088	5.39759e-24	94276526	433540	0.0889	10	ebi-a-GCST010118	rs7895832	T	A	0.177	Type 2 diabetes || id:ebi-a-GCST010118	TRUE	reported	igd	0.823	22.6306
94	0.01	2.52197e-09	63717113	433540	-0.0596	10	ebi-a-GCST010118	rs146716733	T	C	0.1317	Type 2 diabetes || id:ebi-a-GCST010118	TRUE	reported	igd	0.8683	10.4559
95	0.0082	5.21675e-13	64901223	433540	-0.0592	10	ebi-a-GCST010118	rs16918226	T	A	0.2059	Type 2 diabetes || id:ebi-a-GCST010118	TRUE	reported	igd	0.7941	18.1367
96	0.0067	5.36661e-12	77314617	433540	-0.0462	10	ebi-a-GCST010118	rs7900112	A	T	0.5141	Type 2 diabetes || id:ebi-a-GCST010118	TRUE	reported	igd	0.5141	26.5093
97	0.0067	2.59699e-09	112801213	433540	0.0399	10	ebi-a-GCST010118	rs7090695	C	G	0.5569	Type 2 diabetes || id:ebi-a-GCST010118	TRUE	reported	igd	0.5569	22.5985
98	0.0081	1.014e-08	12104286	433540	-0.0464	10	ebi-a-GCST010118	rs76203868	G	C	0.2572	Type 2 diabetes || id:ebi-a-GCST010118	TRUE	reported	igd	0.7428	16.8105
99	0.0085	1.52405e-23	12324273	433540	0.085	10	ebi-a-GCST010118	rs10795946	G	C	0.2264	Type 2 diabetes || id:ebi-a-GCST010118	TRUE	reported	igd	0.7736	26.9568
100	0.007	1.81702e-08	12569272	433540	0.0394	10	ebi-a-GCST010118	rs7084330	G	C	0.3365	Type 2 diabetes || id:ebi-a-GCST010118	TRUE	reported	igd	0.6635	19.3127
101	0.0077	1.26503e-71	94435673	433540	-0.1378	10	ebi-a-GCST010118	rs35906730	A	G	0.7355	Type 2 diabetes || id:ebi-a-GCST010118	TRUE	reported	igd	0.7355	53.8695
105	0.0071	5.27959e-17	122929493	433540	0.0595	10	ebi-a-GCST010118	rs10886863	C	T	0.6641	Type 2 diabetes || id:ebi-a-GCST010118	TRUE	reported	igd	0.6641	28.7829
106	0.0069	9.77012e-62	12309139	433540	0.1144	10	ebi-a-GCST010118	rs11257657	G	C	0.4832	Type 2 diabetes || id:ebi-a-GCST010118	TRUE	reported	igd	0.5168	64.1921
107	0.0068	6.54636e-19	80943841	433540	-0.0604	10	ebi-a-GCST010118	rs703980	A	G	0.4334	Type 2 diabetes || id:ebi-a-GCST010118	TRUE	reported	igd	0.5666	33.6155
109	0.0074	1e-200	2858546	433540	-0.2476	11	ebi-a-GCST010118	rs2237897	T	C	0.3679	Type 2 diabetes || id:ebi-a-GCST010118	TRUE	reported	igd	0.6321	122.006
110	0.0097	2.06919e-24	2827486	433540	0.0989	11	ebi-a-GCST010118	rs3852529	T	C	0.164	Type 2 diabetes || id:ebi-a-GCST010118	TRUE	reported	igd	0.836	21.4922
111	0.0069	1.70294e-26	17415190	433540	-0.0735	11	ebi-a-GCST010118	rs4148646	G	C	0.6154	Type 2 diabetes || id:ebi-a-GCST010118	TRUE	reported	igd	0.6154	38.8958
112	0.0066	1.617e-10	27724745	433540	0.0422	11	ebi-a-GCST010118	rs988748	G	C	0.5648	Type 2 diabetes || id:ebi-a-GCST010118	TRUE	reported	igd	0.5648	24.1763
114	0.0081	4.93174e-24	2892955	433540	0.0819	11	ebi-a-GCST010118	rs2289488	C	G	0.3147	Type 2 diabetes || id:ebi-a-GCST010118	TRUE	reported	igd	0.6853	33.6064
116	0.0068	4.48497e-08	92708710	433540	0.0372	11	ebi-a-GCST010118	rs10830963	G	C	0.421	Type 2 diabetes || id:ebi-a-GCST010118	TRUE	reported	igd	0.579	20.4982
117	0.0085	2.46099e-10	4376091	433540	0.0538	12	ebi-a-GCST010118	rs12818766	A	G	0.2787	Type 2 diabetes || id:ebi-a-GCST010118	TRUE	reported	igd	0.7213	19.555
118	0.0096	1.04112e-12	4381981	433540	-0.0684	12	ebi-a-GCST010118	rs7304270	T	C	0.2386	Type 2 diabetes || id:ebi-a-GCST010118	TRUE	reported	igd	0.7614	19.8947
119	0.007	7.76247e-12	108629780	433540	-0.0479	12	ebi-a-GCST010118	rs1426371	A	G	0.5089	Type 2 diabetes || id:ebi-a-GCST010118	TRUE	reported	igd	0.5089	26.3185
121	0.0077	4.06912e-19	31456888	433540	0.0688	12	ebi-a-GCST010118	rs4930974	T	C	0.2693	Type 2 diabetes || id:ebi-a-GCST010118	TRUE	reported	igd	0.7307	27.0619
123	0.0071	6.57961e-21	27963402	433540	-0.0666	12	ebi-a-GCST010118	rs3751236	A	G	0.3283	Type 2 diabetes || id:ebi-a-GCST010118	TRUE	reported	igd	0.6717	31.8683
124	0.0069	5.67401e-09	97850215	433540	-0.0402	12	ebi-a-GCST010118	rs10860209	A	C	0.411	Type 2 diabetes || id:ebi-a-GCST010118	TRUE	reported	igd	0.589	21.6849
125	0.0087	4.85959e-16	121432299	433540	0.0706	12	ebi-a-GCST010118	rs55783344	T	C	0.1838	Type 2 diabetes || id:ebi-a-GCST010118	TRUE	reported	igd	0.8162	18.7066
126	0.0071	4.95222e-16	66232810	433540	0.0576	12	ebi-a-GCST010118	rs2583934	T	G	0.3396	Type 2 diabetes || id:ebi-a-GCST010118	TRUE	reported	igd	0.6604	28.0095
127	0.0068	4.9136e-11	71449521	433540	0.0447	12	ebi-a-GCST010118	rs7313668	T	G	0.3742	Type 2 diabetes || id:ebi-a-GCST010118	TRUE	reported	igd	0.6258	23.6773
128	0.0077	1.53603e-15	118400856	433540	0.0614	12	ebi-a-GCST010118	rs111246699	A	G	0.2572	Type 2 diabetes || id:ebi-a-GCST010118	TRUE	reported	igd	0.7428	23.4312
129	0.007	3.33304e-09	22589883	433540	-0.0414	13	ebi-a-GCST010118	rs9316706	G	A	0.6495	Type 2 diabetes || id:ebi-a-GCST010118	TRUE	reported	igd	0.6495	20.697
130	0.0084	2.22101e-10	51088809	433540	-0.0533	13	ebi-a-GCST010118	rs123378	A	G	0.8049	Type 2 diabetes || id:ebi-a-GCST010118	TRUE	reported	igd	0.8049	15.3011
131	0.0076	1.31492e-31	80705730	433540	-0.0889	13	ebi-a-GCST010118	rs17072370	A	T	0.2787	Type 2 diabetes || id:ebi-a-GCST010118	TRUE	reported	igd	0.7213	36.2588
132	0.009	7.23602e-18	91948047	433540	-0.0775	13	ebi-a-GCST010118	rs9523295	A	G	0.1676	Type 2 diabetes || id:ebi-a-GCST010118	TRUE	reported	igd	0.8324	18.4592
133	0.0066	1.456e-08	33575692	433540	-0.0374	13	ebi-a-GCST010118	rs391933	A	G	0.545	Type 2 diabetes || id:ebi-a-GCST010118	TRUE	reported	igd	0.545	21.6049
134	0.0067	1.692e-21	26781528	433540	-0.0638	13	ebi-a-GCST010118	rs10507349	A	G	0.434	Type 2 diabetes || id:ebi-a-GCST010118	TRUE	reported	igd	0.566	36.0668
135	0.0084	1.91999e-08	101250258	433540	0.0472	14	ebi-a-GCST010118	rs77789961	T	C	0.2517	Type 2 diabetes || id:ebi-a-GCST010118	TRUE	reported	igd	0.7483	16.2547
136	0.009	7.45933e-11	101255172	433540	-0.0586	14	ebi-a-GCST010118	rs73347525	G	A	0.2444	Type 2 diabetes || id:ebi-a-GCST010118	TRUE	reported	igd	0.7556	18.4755
137	0.0071	1.49599e-08	103237952	433540	0.0402	14	ebi-a-GCST010118	rs55700915	A	G	0.4344	Type 2 diabetes || id:ebi-a-GCST010118	TRUE	reported	igd	0.5656	21.3877
138	0.0075	1.017e-09	24878370	433540	-0.0458	14	ebi-a-GCST010118	rs12437434	T	C	0.2873	Type 2 diabetes || id:ebi-a-GCST010118	TRUE	reported	igd	0.7127	19.2158
139	0.0066	1.97301e-09	38809661	433540	-0.0396	14	ebi-a-GCST010118	rs61975988	G	A	0.5431	Type 2 diabetes || id:ebi-a-GCST010118	TRUE	reported	igd	0.5431	22.8971
140	0.0073	8.40621e-11	77382503	433540	0.0474	14	ebi-a-GCST010118	rs58524310	G	A	0.3268	Type 2 diabetes || id:ebi-a-GCST010118	TRUE	reported	igd	0.6732	21.9649
141	0.0067	1.06096e-22	91522253	433540	0.0657	15	ebi-a-GCST010118	rs8026714	A	G	0.486	Type 2 diabetes || id:ebi-a-GCST010118	TRUE	reported	igd	0.514	37.7826
142	0.0083	1.741e-20	40615872	433540	0.077	15	ebi-a-GCST010118	rs12907887	C	G	0.229	Type 2 diabetes || id:ebi-a-GCST010118	TRUE	reported	igd	0.771	25.2016
143	0.0067	1.62218e-26	77776498	433540	0.0714	15	ebi-a-GCST010118	rs952471	G	C	0.3949	Type 2 diabetes || id:ebi-a-GCST010118	TRUE	reported	igd	0.6051	39.2888
144	0.0071	6.28594e-10	91458552	433540	-0.0439	15	ebi-a-GCST010118	rs1266488	C	T	0.4125	Type 2 diabetes || id:ebi-a-GCST010118	TRUE	reported	igd	0.5875	23.0451
145	0.0067	7.29625e-33	62394264	433540	-0.08	15	ebi-a-GCST010118	rs8037894	C	G	0.4144	Type 2 diabetes || id:ebi-a-GCST010118	TRUE	reported	igd	0.5856	44.7543
146	0.0079	2.133e-09	75595357	433540	0.0473	15	ebi-a-GCST010118	rs35917376	A	T	0.6207	Type 2 diabetes || id:ebi-a-GCST010118	TRUE	reported	igd	0.6207	21.6731
147	0.01	3.39e-08	28546173	433540	-0.0552	15	ebi-a-GCST010118	rs76704029	C	T	0.2678	Type 2 diabetes || id:ebi-a-GCST010118	TRUE	reported	igd	0.7322	16.6253
148	0.0068	2.05589e-14	38828140	433540	0.052	15	ebi-a-GCST010118	rs8043085	T	G	0.4493	Type 2 diabetes || id:ebi-a-GCST010118	TRUE	reported	igd	0.5507	29.1345
150	0.0078	9.4254e-14	62133674	433540	-0.0581	15	ebi-a-GCST010118	rs9788635	T	C	0.2437	Type 2 diabetes || id:ebi-a-GCST010118	TRUE	reported	igd	0.7563	21.106
151	0.0084	8.38108e-13	90428894	433540	-0.0601	15	ebi-a-GCST010118	rs10852123	C	A	0.799	Type 2 diabetes || id:ebi-a-GCST010118	TRUE	reported	igd	0.799	17.6529
152	0.0071	2.78702e-09	3647098	433540	0.0422	16	ebi-a-GCST010118	rs2240885	A	G	0.4027	Type 2 diabetes || id:ebi-a-GCST010118	TRUE	reported	igd	0.5973	21.9825
155	0.0089	1.54989e-48	53800954	433540	0.1303	16	ebi-a-GCST010118	rs1421085	C	T	0.1668	Type 2 diabetes || id:ebi-a-GCST010118	TRUE	reported	igd	0.8332	31.3438
156	0.0075	3.4033e-12	73100308	433540	-0.0522	16	ebi-a-GCST010118	rs6416749	T	C	0.6254	Type 2 diabetes || id:ebi-a-GCST010118	TRUE	reported	igd	0.6254	25.0871
157	0.0079	1.31099e-13	36062935	433540	0.0585	17	ebi-a-GCST010118	rs3094508	C	T	0.2441	Type 2 diabetes || id:ebi-a-GCST010118	TRUE	reported	igd	0.7559	21.0052
158	0.0115	8.98669e-24	6953781	433540	0.1156	17	ebi-a-GCST010118	rs186568031	T	C	0.0942	Type 2 diabetes || id:ebi-a-GCST010118	TRUE	reported	igd	0.9058	13.1654
159	0.0073	1.59698e-60	36101156	433540	-0.1198	17	ebi-a-GCST010118	rs7501939	C	T	0.7023	Type 2 diabetes || id:ebi-a-GCST010118	TRUE	reported	igd	0.7023	53.0816
160	0.0072	2.14902e-09	29647358	433540	-0.0431	17	ebi-a-GCST010118	rs3837848	AT	A	0.3491	Type 2 diabetes || id:ebi-a-GCST010118	TRUE	reported	igd	0.6509	20.9106
162	0.007	2.14398e-08	6964583	433540	0.0392	17	ebi-a-GCST010118	rs7210161	C	G	0.502	Type 2 diabetes || id:ebi-a-GCST010118	TRUE	reported	igd	0.502	21.5244
163	0.0076	8.70102e-10	7076836	433540	0.0466	18	ebi-a-GCST010118	rs9948462	T	C	0.7048	Type 2 diabetes || id:ebi-a-GCST010118	TRUE	reported	igd	0.7048	19.6065
164	0.0078	4.8095e-27	57852587	433540	0.084	18	ebi-a-GCST010118	rs476828	C	T	0.243	Type 2 diabetes || id:ebi-a-GCST010118	TRUE	reported	igd	0.757	30.5117
165	0.0076	1.97301e-09	46239123	433540	0.0456	19	ebi-a-GCST010118	rs12610052	C	T	0.3068	Type 2 diabetes || id:ebi-a-GCST010118	TRUE	reported	igd	0.6932	19.6115
166	0.0079	4.02161e-32	46157916	433540	-0.0932	19	ebi-a-GCST010118	rs7507912	A	G	0.2633	Type 2 diabetes || id:ebi-a-GCST010118	TRUE	reported	igd	0.7367	35.2792
167	0.0071	9.79693e-10	7986638	433540	0.0434	19	ebi-a-GCST010118	rs475002	G	C	0.5184	Type 2 diabetes || id:ebi-a-GCST010118	TRUE	reported	igd	0.5184	23.4725
169	0.0068	2.28876e-16	33887405	433540	-0.0558	19	ebi-a-GCST010118	rs7250869	C	T	0.4663	Type 2 diabetes || id:ebi-a-GCST010118	TRUE	reported	igd	0.5337	31.4593
170	0.0071	1.65798e-09	22430241	433540	-0.0428	20	ebi-a-GCST010118	rs73085586	A	G	0.3563	Type 2 diabetes || id:ebi-a-GCST010118	TRUE	reported	igd	0.6437	21.2555
171	0.007	4.32096e-09	48837478	433540	-0.0411	20	ebi-a-GCST010118	rs6012878	A	G	0.4428	Type 2 diabetes || id:ebi-a-GCST010118	TRUE	reported	igd	0.5572	22.276
172	0.0069	2.25009e-21	42994812	433540	0.0655	20	ebi-a-GCST010118	rs12625671	C	T	0.442	Type 2 diabetes || id:ebi-a-GCST010118	TRUE	reported	igd	0.558	36.1
173	0.0072	1.393e-10	42814688	433540	-0.0462	20	ebi-a-GCST010118	rs2092518	T	G	0.3388	Type 2 diabetes || id:ebi-a-GCST010118	TRUE	reported	igd	0.6612	22.1027
174	0.0077	1.79308e-17	50356302	433540	-0.0655	22	ebi-a-GCST010118	rs28691713	T	C	0.4448	Type 2 diabetes || id:ebi-a-GCST010118	TRUE	reported	igd	0.5552	32.3671

## Sheet: Supplemental Table 3
Supplemental Table 3. instrumental variables from bbj-a-77
	pval.exposure	chr.exposure	samplesize.exposure	beta.exposure	pos.exposure	se.exposure	id.exposure	SNP	effect_allele.exposure	other_allele.exposure	eaf.exposure	exposure	mr_keep.exposure	pval_origin.exposure	data_source.exposure	maf.exposure	fval
1	1.629e-09	1	NA	-0.0621	22068326	0.0103	bbj-a-77	rs1825307	G	A	0.755	Type 2 Diabetes || id:bbj-a-77	TRUE	reported	igd	0.755	11.4105
2	2.51884e-11	1	NA	0.0802	51103268	0.012	bbj-a-77	rs12031188	C	T	0.7953	Type 2 Diabetes || id:bbj-a-77	TRUE	reported	igd	0.7953	11.1307
4	3.89673e-15	2	NA	0.0691	27734972	0.0088	bbj-a-77	rs6547692	A	G	0.4395	Type 2 Diabetes || id:bbj-a-77	TRUE	reported	igd	0.5605	19.8656
6	5.09096e-09	2	NA	-0.0514	149430804	0.0088	bbj-a-77	rs4972387	C	T	0.4119	Type 2 Diabetes || id:bbj-a-77	TRUE	reported	igd	0.5881	14.4963
9	1.911e-09	2	NA	0.0528	234303281	0.0088	bbj-a-77	rs838720	G	C	0.4486	Type 2 Diabetes || id:bbj-a-77	TRUE	reported	igd	0.5514	15.2107
10	3.40879e-23	3	NA	-0.0935	23390488	0.0094	bbj-a-77	rs12630883	A	C	0.3308	Type 2 Diabetes || id:bbj-a-77	TRUE	reported	igd	0.6692	22.6419
11	6.11223e-43	3	NA	0.1298	185495320	0.0094	bbj-a-77	rs13092876	A	G	0.34	Type 2 Diabetes || id:bbj-a-77	TRUE	reported	igd	0.66	31.9947
12	5.20104e-09	3	NA	0.0514	121956953	0.0088	bbj-a-77	rs2134223	A	G	0.4709	Type 2 Diabetes || id:bbj-a-77	TRUE	reported	igd	0.5291	14.9129
14	2.61698e-15	3	NA	-0.0748	63999322	0.0095	bbj-a-77	rs3816157	A	G	0.3217	Type 2 Diabetes || id:bbj-a-77	TRUE	reported	igd	0.6783	17.6275
15	4.57899e-10	4	NA	-0.0745	1782586	0.012	bbj-a-77	rs4865473	A	G	0.7079	Type 2 Diabetes || id:bbj-a-77	TRUE	reported	igd	0.7079	13.1447
16	2.00701e-09	4	NA	0.0576	45186139	0.0096	bbj-a-77	rs10938398	A	G	0.297	Type 2 Diabetes || id:bbj-a-77	TRUE	reported	igd	0.703	12.8255
17	1.20199e-24	4	NA	-0.1042	1244218	0.0102	bbj-a-77	rs79407053	A	G	0.3087	Type 2 Diabetes || id:bbj-a-77	TRUE	reported	igd	0.6913	22.4148
19	2.73212e-17	4	NA	-0.0745	153520279	0.0088	bbj-a-77	rs10011838	A	G	0.5382	Type 2 Diabetes || id:bbj-a-77	TRUE	reported	igd	0.5382	21.6263
20	3.42902e-09	4	NA	-0.0642	71748245	0.0109	bbj-a-77	rs12649012	A	G	0.7884	Type 2 Diabetes || id:bbj-a-77	TRUE	reported	igd	0.7884	10.0471
21	1.79184e-16	5	NA	0.0724	55809138	0.0088	bbj-a-77	rs256903	A	C	0.4694	Type 2 Diabetes || id:bbj-a-77	TRUE	reported	igd	0.5306	21.0556
22	3.50098e-10	5	NA	0.0552	176513896	0.0088	bbj-a-77	rs3135911	A	C	0.4407	Type 2 Diabetes || id:bbj-a-77	TRUE	reported	igd	0.5593	15.8504
24	2.06205e-85	6	NA	0.1722	20688121	0.0088	bbj-a-77	rs10440833	A	T	0.4242	Type 2 Diabetes || id:bbj-a-77	TRUE	reported	igd	0.5758	49.7389
25	2.84898e-08	6	NA	-0.0523	7226959	0.0094	bbj-a-77	rs9505085	T	C	0.3343	Type 2 Diabetes || id:bbj-a-77	TRUE	reported	igd	0.6657	12.6756
26	1.37689e-17	6	NA	-0.0953	31232543	0.0112	bbj-a-77	rs2844623	T	C	0.2161	Type 2 Diabetes || id:bbj-a-77	TRUE	reported	igd	0.7839	14.7699
27	7.38108e-09	6	NA	-0.0585	32677526	0.0101	bbj-a-77	rs375577071	C	T	0.3536	Type 2 Diabetes || id:bbj-a-77	TRUE	reported	igd	0.6464	13.5581
28	4.3451e-14	6	NA	-0.0889	39039140	0.0118	bbj-a-77	rs9394574	G	A	0.1797	Type 2 Diabetes || id:bbj-a-77	TRUE	reported	igd	0.8203	11.3623
29	8.36758e-12	6	NA	-0.0706	117996631	0.0103	bbj-a-77	rs80196932	C	T	0.2476	Type 2 Diabetes || id:bbj-a-77	TRUE	reported	igd	0.7524	13.0745
30	5.34072e-14	6	NA	-0.0663	137293227	0.0088	bbj-a-77	rs2327777	C	T	0.607	Type 2 Diabetes || id:bbj-a-77	TRUE	reported	igd	0.607	18.4463
31	4.1011e-74	7	NA	0.2761	127253550	0.0152	bbj-a-77	rs2233580	T	C	0.0919	Type 2 Diabetes || id:bbj-a-77	TRUE	reported	igd	0.9081	15.5384
32	1.12699e-08	7	NA	0.0502	157038803	0.0088	bbj-a-77	rs1182389	G	A	0.4626	Type 2 Diabetes || id:bbj-a-77	TRUE	reported	igd	0.5374	14.53
33	1.47299e-10	7	NA	0.0564	15059272	0.0088	bbj-a-77	rs11514706	C	A	0.5218	Type 2 Diabetes || id:bbj-a-77	TRUE	reported	igd	0.5218	16.3988
34	5.32476e-12	7	NA	0.064	44174857	0.0093	bbj-a-77	rs2908279	G	T	0.5985	Type 2 Diabetes || id:bbj-a-77	TRUE	reported	igd	0.5985	16.9612
35	4.8708e-16	7	NA	0.09	69406661	0.0111	bbj-a-77	rs6947395	T	A	0.1981	Type 2 Diabetes || id:bbj-a-77	TRUE	reported	igd	0.8019	13.1888
37	2.33615e-12	7	NA	0.0617	14898282	0.0088	bbj-a-77	rs17168486	T	C	0.3988	Type 2 Diabetes || id:bbj-a-77	TRUE	reported	igd	0.6012	17.2442
39	1.52686e-22	8	NA	0.0859	41508168	0.0088	bbj-a-77	rs6981607	C	A	0.5076	Type 2 Diabetes || id:bbj-a-77	TRUE	reported	igd	0.5076	25.1151
40	2.52116e-30	8	NA	-0.1006	118184783	0.0088	bbj-a-77	rs13266634	T	C	0.4064	Type 2 Diabetes || id:bbj-a-77	TRUE	reported	igd	0.5936	28.4306
41	9.84691e-88	9	NA	-0.1758	22132729	0.0089	bbj-a-77	rs10965247	G	A	0.4367	Type 2 Diabetes || id:bbj-a-77	TRUE	reported	igd	0.5633	50.5844
42	2.66624e-19	9	NA	-0.0797	84308948	0.0089	bbj-a-77	rs2796441	A	G	0.6224	Type 2 Diabetes || id:bbj-a-77	TRUE	reported	igd	0.6224	21.6313
43	6.01866e-21	9	NA	0.1341	139237902	0.0143	bbj-a-77	rs28624681	C	T	0.875	Type 2 Diabetes || id:bbj-a-77	TRUE	reported	igd	0.875	10.4898
45	7.78037e-12	9	NA	0.0603	4289050	0.0088	bbj-a-77	rs7034200	A	C	0.412	Type 2 Diabetes || id:bbj-a-77	TRUE	reported	igd	0.588	17.0268
46	4.81726e-39	10	NA	-0.166	94466439	0.0127	bbj-a-77	rs12219514	G	A	0.8703	Type 2 Diabetes || id:bbj-a-77	TRUE	reported	igd	0.8703	15.1206
48	2.5398e-18	10	NA	0.1036	94420817	0.0119	bbj-a-77	rs78216286	T	C	0.1625	Type 2 Diabetes || id:bbj-a-77	TRUE	reported	igd	0.8375	12.1262
49	7.52835e-27	10	NA	-0.1013	12302607	0.0094	bbj-a-77	rs10795945	C	T	0.5498	Type 2 Diabetes || id:bbj-a-77	TRUE	reported	igd	0.5498	27.4874
50	2.10199e-09	10	NA	-0.0527	77310016	0.0088	bbj-a-77	rs10762670	C	T	0.4941	Type 2 Diabetes || id:bbj-a-77	TRUE	reported	igd	0.5059	15.3428
51	3.3458e-14	10	NA	-0.0667	80942855	0.0088	bbj-a-77	rs703981	C	G	0.4452	Type 2 Diabetes || id:bbj-a-77	TRUE	reported	igd	0.5548	19.2213
53	4.30101e-09	10	NA	-0.0555	123001732	0.0094	bbj-a-77	rs7922045	T	C	0.4732	Type 2 Diabetes || id:bbj-a-77	TRUE	reported	igd	0.5268	15.0835
55	2.22101e-08	10	NA	-0.0492	124195485	0.0088	bbj-a-77	rs7072204	G	A	0.5738	Type 2 Diabetes || id:bbj-a-77	TRUE	reported	igd	0.5738	14.0054
56	9.75708e-09	11	NA	0.0599	128389391	0.0104	bbj-a-77	rs11819995	T	C	0.2201	Type 2 Diabetes || id:bbj-a-77	TRUE	reported	igd	0.7799	10.1096
61	2.58226e-168	11	NA	-0.2612	2858546	0.0094	bbj-a-77	rs2237897	T	C	0.3791	Type 2 Diabetes || id:bbj-a-77	TRUE	reported	igd	0.6209	68.6293
63	7.37904e-14	12	NA	-0.0714	27963402	0.0095	bbj-a-77	rs3751236	A	G	0.309	Type 2 Diabetes || id:bbj-a-77	TRUE	reported	igd	0.691	16.456
64	3.8256e-17	12	NA	0.0983	31441179	0.0117	bbj-a-77	rs80234489	C	A	0.1912	Type 2 Diabetes || id:bbj-a-77	TRUE	reported	igd	0.8088	13.3045
65	1.28301e-08	12	NA	-0.05	108613151	0.0088	bbj-a-77	rs11113776	A	G	0.5404	Type 2 Diabetes || id:bbj-a-77	TRUE	reported	igd	0.5404	14.458
66	1.83101e-08	12	NA	0.0577	118406696	0.0103	bbj-a-77	rs79310463	T	C	0.2638	Type 2 Diabetes || id:bbj-a-77	TRUE	reported	igd	0.7362	11.1299
68	1.23994e-15	13	NA	-0.0704	26781528	0.0088	bbj-a-77	rs10507349	A	G	0.449	Type 2 Diabetes || id:bbj-a-77	TRUE	reported	igd	0.551	20.3306
69	4.92504e-09	13	NA	-0.0615	51088809	0.0105	bbj-a-77	rs123378	A	G	0.779	Type 2 Diabetes || id:bbj-a-77	TRUE	reported	igd	0.779	10.3119
70	1.523e-19	13	NA	-0.0929	80708732	0.0103	bbj-a-77	rs1327315	T	C	0.2658	Type 2 Diabetes || id:bbj-a-77	TRUE	reported	igd	0.7342	18.0622
71	1.23509e-11	15	NA	0.0596	77781926	0.0088	bbj-a-77	rs965480	G	A	0.4132	Type 2 Diabetes || id:bbj-a-77	TRUE	reported	igd	0.5868	16.8423
72	5.78096e-09	15	NA	-0.0512	38878922	0.0088	bbj-a-77	rs8043245	G	A	0.5086	Type 2 Diabetes || id:bbj-a-77	TRUE	reported	igd	0.5086	14.9008
73	4.31519e-14	15	NA	-0.0722	40636418	0.0096	bbj-a-77	rs746673	A	G	0.5916	Type 2 Diabetes || id:bbj-a-77	TRUE	reported	igd	0.5916	18.6516
74	2.13599e-17	15	NA	-0.0748	62394264	0.0088	bbj-a-77	rs8037894	C	G	0.4241	Type 2 Diabetes || id:bbj-a-77	TRUE	reported	igd	0.5759	21.3349
75	2.31398e-10	15	NA	0.0557	91512067	0.0088	bbj-a-77	rs2290203	A	G	0.4739	Type 2 Diabetes || id:bbj-a-77	TRUE	reported	igd	0.5261	16.1803
76	1.05512e-28	16	NA	0.1223	53800954	0.011	bbj-a-77	rs1421085	C	T	0.202	Type 2 Diabetes || id:bbj-a-77	TRUE	reported	igd	0.798	18.394
78	2.23512e-34	17	NA	-0.1161	36102381	0.0095	bbj-a-77	rs11651052	G	A	0.6762	Type 2 Diabetes || id:bbj-a-77	TRUE	reported	igd	0.6762	27.5752
79	1.187e-09	17	NA	-0.0634	36048940	0.0104	bbj-a-77	rs3094512	A	G	0.7589	Type 2 Diabetes || id:bbj-a-77	TRUE	reported	igd	0.7589	11.4123
82	5.22757e-14	18	NA	0.0785	57838401	0.0104	bbj-a-77	rs663129	A	G	0.2162	Type 2 Diabetes || id:bbj-a-77	TRUE	reported	igd	0.7838	13.0966
83	3.24564e-19	19	NA	0.0788	46166604	0.0088	bbj-a-77	rs77300780	T	C	0.5426	Type 2 Diabetes || id:bbj-a-77	TRUE	reported	igd	0.5426	22.8543
86	1.83599e-09	20	NA	-0.0538	50155386	0.009	bbj-a-77	rs6021276	C	T	0.5734	Type 2 Diabetes || id:bbj-a-77	TRUE	reported	igd	0.5734	14.9846

## Sheet: Supplemental Table 4
Supplemental Table 4. Instrumental variables from bbj-a-153
	se.exposure	samplesize.exposure	pos.exposure	pval.exposure	chr.exposure	beta.exposure	id.exposure	SNP	effect_allele.exposure	other_allele.exposure	eaf.exposure	exposure	mr_keep.exposure	pval_origin.exposure	data_source.exposure	maf.exposure	fval
6	0.0098328	NA	218782540	3.75924e-08	2	0.0540981	bbj-a-153	rs28403309	C	T	0.364233	Type 2 diabetes || id:bbj-a-153	TRUE	reported	igd	0.635767	11.5297
7	0.00913476	NA	60586707	4.46817e-08	2	0.0499788	bbj-a-153	rs243018	G	C	0.677444	Type 2 diabetes || id:bbj-a-153	TRUE	reported	igd	0.677444	10.8157
9	0.00838052	NA	149559453	1.82852e-08	2	0.0471613	bbj-a-153	rs56008953	G	A	0.587465	Type 2 diabetes || id:bbj-a-153	TRUE	reported	igd	0.587465	12.3471
10	0.00845182	NA	234303337	8.77263e-09	2	-0.0486224	bbj-a-153	rs6759355	T	C	0.545636	Type 2 diabetes || id:bbj-a-153	TRUE	reported	igd	0.545636	12.9157
11	0.00831075	NA	27730940	8.51138e-20	2	0.0756816	bbj-a-153	rs1260326	C	T	0.440921	Type 2 diabetes || id:bbj-a-153	TRUE	reported	igd	0.559079	20.4019
12	0.00871404	NA	185524081	1.692e-47	3	0.126154	bbj-a-153	rs4686392	G	A	0.336308	Type 2 diabetes || id:bbj-a-153	TRUE	reported	igd	0.663692	29.4958
13	0.00875749	NA	23390507	5.19757e-25	3	-0.0904581	bbj-a-153	rs12633613	C	T	0.330702	Type 2 diabetes || id:bbj-a-153	TRUE	reported	igd	0.669298	20.7821
14	0.00881312	NA	63999322	3.17834e-19	3	-0.0789862	bbj-a-153	rs3816157	A	G	0.321066	Type 2 diabetes || id:bbj-a-153	TRUE	reported	igd	0.678934	17.7327
15	0.00821681	NA	121969712	5.08862e-11	3	0.0539705	bbj-a-153	rs7644981	A	G	0.472483	Type 2 diabetes || id:bbj-a-153	TRUE	reported	igd	0.527517	14.839
17	0.00841524	NA	153520279	1.1311e-21	4	-0.0804847	bbj-a-153	rs10011838	A	G	0.540169	Type 2 diabetes || id:bbj-a-153	TRUE	reported	igd	0.540169	21.6029
19	0.0091379	NA	1240299	5.78629e-29	4	-0.102061	bbj-a-153	rs730831	G	T	0.308145	Type 2 diabetes || id:bbj-a-153	TRUE	reported	igd	0.691855	21.6536
20	0.00900074	NA	45181334	4.79424e-09	4	0.0526918	bbj-a-153	rs12507026	T	A	0.297982	Type 2 diabetes || id:bbj-a-153	TRUE	reported	igd	0.702018	11.0801
23	0.0087597	NA	176532217	8.51922e-12	5	0.0598246	bbj-a-153	rs193457	G	C	0.403862	Type 2 diabetes || id:bbj-a-153	TRUE	reported	igd	0.596138	14.9043
24	0.00823486	NA	55806751	1.80385e-17	5	0.0700438	bbj-a-153	rs459193	G	A	0.467004	Type 2 diabetes || id:bbj-a-153	TRUE	reported	igd	0.532996	19.231
25	0.00860859	NA	74846613	1.67761e-10	5	-0.0549941	bbj-a-153	rs5744598	A	G	0.356388	Type 2 diabetes || id:bbj-a-153	TRUE	reported	igd	0.643612	13.2719
27	0.00848907	NA	87936379	1.40767e-09	5	0.0513979	bbj-a-153	rs7721099	C	T	0.443847	Type 2 diabetes || id:bbj-a-153	TRUE	reported	igd	0.556153	13.5385
29	0.0100446	NA	31232543	2.00678e-12	6	-0.0706538	bbj-a-153	rs2844623	T	C	0.213766	Type 2 diabetes || id:bbj-a-153	TRUE	reported	igd	0.786234	10.6944
31	0.00980143	NA	118011723	2.74625e-09	6	-0.0582802	bbj-a-153	rs72951506	T	C	0.249672	Type 2 diabetes || id:bbj-a-153	TRUE	reported	igd	0.750328	10.0736
32	0.00839705	NA	20683164	1.90283e-93	6	0.17219	bbj-a-153	rs9350271	A	G	0.425466	Type 2 diabetes || id:bbj-a-153	TRUE	reported	igd	0.574534	46.1178
33	0.010755	NA	39037662	1.08718e-17	6	-0.0921091	bbj-a-153	rs9380826	C	G	0.180057	Type 2 diabetes || id:bbj-a-153	TRUE	reported	igd	0.819943	11.4421
34	0.00862633	NA	137287702	5.35303e-17	6	-0.0722772	bbj-a-153	rs6918311	G	A	0.600302	Type 2 diabetes || id:bbj-a-153	TRUE	reported	igd	0.600302	18.2522
35	0.00924128	NA	69747088	2.1742e-17	7	0.0784038	bbj-a-153	rs6460541	G	A	0.276302	Type 2 diabetes || id:bbj-a-153	TRUE	reported	igd	0.723698	15.3811
37	0.00846262	NA	14919852	1.42791e-12	7	0.0599266	bbj-a-153	rs10281892	G	A	0.414903	Type 2 diabetes || id:bbj-a-153	TRUE	reported	igd	0.585097	15.5874
40	0.00859884	NA	15063379	1.92035e-10	7	0.0547538	bbj-a-153	rs80005921	G	A	0.484084	Type 2 diabetes || id:bbj-a-153	TRUE	reported	igd	0.515916	14.4116
41	0.00844154	NA	44174857	1.00923e-10	7	0.0545793	bbj-a-153	rs2908279	G	T	0.598375	Type 2 diabetes || id:bbj-a-153	TRUE	reported	igd	0.598375	14.0789
42	0.0143537	NA	127253550	6.30086e-90	7	0.288622	bbj-a-153	rs2233580	T	C	0.092687	Type 2 diabetes || id:bbj-a-153	TRUE	reported	igd	0.907313	15.331
44	0.00837836	NA	156982450	2.39387e-10	7	-0.0530658	bbj-a-153	rs6950739	C	T	0.539867	Type 2 diabetes || id:bbj-a-153	TRUE	reported	igd	0.539867	14.2571
45	0.00820964	NA	41509259	2.12129e-21	8	0.0779825	bbj-a-153	rs12549902	A	G	0.508969	Type 2 diabetes || id:bbj-a-153	TRUE	reported	igd	0.508969	21.5877
46	0.0083785	NA	118184783	1.22124e-37	8	-0.107436	bbj-a-153	rs13266634	T	C	0.406618	Type 2 diabetes || id:bbj-a-153	TRUE	reported	igd	0.593382	28.2239
47	0.00846673	NA	84308948	2.51362e-19	9	-0.0761005	bbj-a-153	rs2796441	A	G	0.621121	Type 2 diabetes || id:bbj-a-153	TRUE	reported	igd	0.621121	19.2127
48	0.00834551	NA	22132729	3.20553e-99	9	-0.176449	bbj-a-153	rs10965247	G	A	0.436629	Type 2 diabetes || id:bbj-a-153	TRUE	reported	igd	0.563371	47.8899
50	0.00857649	NA	4283137	1.59148e-15	9	-0.0683514	bbj-a-153	rs1574285	T	G	0.565634	Type 2 diabetes || id:bbj-a-153	TRUE	reported	igd	0.565634	17.7733
52	0.00891773	NA	12303371	5.91153e-33	10	-0.106636	bbj-a-153	rs4747971	C	T	0.547402	Type 2 diabetes || id:bbj-a-153	TRUE	reported	igd	0.547402	27.0103
53	0.00892675	NA	71291090	4.40555e-08	10	-0.048863	bbj-a-153	rs60565877	C	T	0.433137	Type 2 diabetes || id:bbj-a-153	TRUE	reported	igd	0.566863	12.1663
54	0.0095375	NA	94435673	7.55962e-43	10	-0.130868	bbj-a-153	rs35906730	A	G	0.736647	Type 2 diabetes || id:bbj-a-153	TRUE	reported	igd	0.736647	24.2371
57	0.00824474	NA	77303697	2.04951e-10	10	-0.0524166	bbj-a-153	rs7906280	C	T	0.493449	Type 2 diabetes || id:bbj-a-153	TRUE	reported	igd	0.506551	14.401
58	0.0082719	NA	80943841	1.37911e-14	10	-0.0636793	bbj-a-153	rs703980	A	G	0.446584	Type 2 diabetes || id:bbj-a-153	TRUE	reported	igd	0.553416	17.2656
63	0.0084246	NA	17418477	8.06826e-10	11	-0.0517572	bbj-a-153	rs757110	A	C	0.608552	Type 2 diabetes || id:bbj-a-153	TRUE	reported	igd	0.608552	13.2553
66	0.00871105	NA	2858546	2.58821e-168	11	-0.240884	bbj-a-153	rs2237897	T	C	0.378637	Type 2 diabetes || id:bbj-a-153	TRUE	reported	igd	0.621363	60.2573
70	0.00868332	NA	66232810	1.86857e-10	12	0.0553281	bbj-a-153	rs2583934	T	G	0.34114	Type 2 diabetes || id:bbj-a-153	TRUE	reported	igd	0.65886	12.9695
71	0.00952174	NA	118406696	1.1312e-08	12	0.0543671	bbj-a-153	rs79310463	T	C	0.265611	Type 2 diabetes || id:bbj-a-153	TRUE	reported	igd	0.734389	10.0722
73	0.0108315	NA	31441179	4.14095e-25	12	0.112117	bbj-a-153	rs80234489	C	A	0.19156	Type 2 diabetes || id:bbj-a-153	TRUE	reported	igd	0.80844	14.5277
74	0.00845214	NA	108628067	1.03583e-09	12	-0.0515901	bbj-a-153	rs4964665	C	T	0.548064	Type 2 diabetes || id:bbj-a-153	TRUE	reported	igd	0.548064	13.6961
76	0.00887801	NA	27964996	8.19219e-15	12	-0.0689339	bbj-a-153	rs12578595	T	C	0.313084	Type 2 diabetes || id:bbj-a-153	TRUE	reported	igd	0.686916	15.1381
78	0.00834213	NA	26808256	1.0074e-11	13	-0.056772	bbj-a-153	rs79340173	T	A	0.462296	Type 2 diabetes || id:bbj-a-153	TRUE	reported	igd	0.537704	15.3374
79	0.00939325	NA	80708732	3.36357e-18	13	-0.081707	bbj-a-153	rs1327315	T	C	0.26465	Type 2 diabetes || id:bbj-a-153	TRUE	reported	igd	0.73535	15.3477
81	0.00896637	NA	77375691	1.5433e-08	14	0.0507199	bbj-a-153	rs17105012	A	C	0.318941	Type 2 diabetes || id:bbj-a-153	TRUE	reported	igd	0.681059	11.1175
82	0.00832981	NA	62396189	1.08518e-22	15	-0.0816632	bbj-a-153	rs7167878	A	C	0.424107	Type 2 diabetes || id:bbj-a-153	TRUE	reported	igd	0.575893	21.7762
83	0.00973557	NA	75630160	3.37831e-11	15	0.0645378	bbj-a-153	rs6495168	C	T	0.674268	Type 2 diabetes || id:bbj-a-153	TRUE	reported	igd	0.674268	13.1865
84	0.00874074	NA	40633138	9.80167e-18	15	-0.0749627	bbj-a-153	rs4924455	T	A	0.587158	Type 2 diabetes || id:bbj-a-153	TRUE	reported	igd	0.587158	18.8802
85	0.00823522	NA	91512067	2.73792e-10	15	0.0519884	bbj-a-153	rs2290203	A	G	0.473052	Type 2 diabetes || id:bbj-a-153	TRUE	reported	igd	0.526948	14.2598
86	0.00821273	NA	38846347	3.76877e-11	15	0.0543099	bbj-a-153	rs36027443	A	G	0.498527	Type 2 diabetes || id:bbj-a-153	TRUE	reported	igd	0.501473	14.986
88	0.00838277	NA	77781926	1.89278e-15	15	0.0666278	bbj-a-153	rs965480	G	A	0.412514	Type 2 diabetes || id:bbj-a-153	TRUE	reported	igd	0.587486	17.4817
90	0.0102563	NA	53802494	1.31765e-35	16	0.12774	bbj-a-153	rs11642015	T	C	0.203335	Type 2 diabetes || id:bbj-a-153	TRUE	reported	igd	0.796665	18.318
92	0.00983872	NA	36049552	4.22961e-12	17	0.0681753	bbj-a-153	rs35551980	C	T	0.237315	Type 2 diabetes || id:bbj-a-153	TRUE	reported	igd	0.762685	11.349
94	0.00864082	NA	29673219	2.57959e-08	17	-0.0481105	bbj-a-153	rs2854313	A	T	0.37929	Type 2 diabetes || id:bbj-a-153	TRUE	reported	igd	0.62071	11.8646
95	0.00927886	NA	36099952	2.04362e-38	17	-0.120261	bbj-a-153	rs10908278	A	T	0.69139	Type 2 diabetes || id:bbj-a-153	TRUE	reported	igd	0.69139	25.191
96	0.00947629	NA	57852587	2.31473e-15	18	0.0750826	bbj-a-153	rs476828	C	T	0.251882	Type 2 diabetes || id:bbj-a-153	TRUE	reported	igd	0.748118	13.5245
98	0.0103708	NA	46157916	4.32315e-17	19	-0.0871538	bbj-a-153	rs7507912	A	G	0.213337	Type 2 diabetes || id:bbj-a-153	TRUE	reported	igd	0.786663	12.771
99	0.00824392	NA	33896432	1.25225e-09	19	-0.0500687	bbj-a-153	rs4805881	C	A	0.47437	Type 2 diabetes || id:bbj-a-153	TRUE	reported	igd	0.52563	13.719
100	0.0102733	NA	43002910	1.77869e-12	20	0.0724353	bbj-a-153	rs6031563	T	G	0.796118	Type 2 diabetes || id:bbj-a-153	TRUE	reported	igd	0.796118	10.3511
101	0.00843093	NA	50155386	1.91465e-09	20	-0.0506268	bbj-a-153	rs6021276	C	T	0.570779	Type 2 diabetes || id:bbj-a-153	TRUE	reported	igd	0.570779	13.3249
102	0.00829012	NA	29369398	3.92636e-09	22	0.0488062	bbj-a-153	rs5762925	C	A	0.51728	Type 2 diabetes || id:bbj-a-153	TRUE	reported	igd	0.51728	13.3151

## Sheet: Supplemental Table 5
Supplemental Table 5. Results of MR analysis of the causal effect of T2DM on digestive system tumors in European
outcome	exposure	Method	No.SNP	Pvalue	OR (95% CI)*	Q_pval	egger_intercept	I Pvalue
Malignant neoplasm of oesophagus (all cancers excluded) || id:finn-b-C3_OESOPHAGUS_EXALLC	Type 2 diabetes || id:ebi-a-GCST005413	MR Egger	15	0.816714	0.89 (0.34 to 2.33)
Malignant neoplasm of oesophagus (all cancers excluded) || id:finn-b-C3_OESOPHAGUS_EXALLC	Type 2 diabetes || id:ebi-a-GCST005413	Weighted median	15	0.648388	1.14 (0.66 to 1.96)
Malignant neoplasm of oesophagus (all cancers excluded) || id:finn-b-C3_OESOPHAGUS_EXALLC	Type 2 diabetes || id:ebi-a-GCST005413	Inverse variance weighted	15	0.322203	1.20 (0.83 to 1.73)	0.519043	0.0500676	0.519876
Malignant neoplasm of oesophagus (all cancers excluded) || id:finn-b-C3_OESOPHAGUS_EXALLC	Type 2 diabetes || id:ebi-a-GCST005413	Simple mode	15	0.608181	1.23 (0.56 to 2.71)
Malignant neoplasm of oesophagus (all cancers excluded) || id:finn-b-C3_OESOPHAGUS_EXALLC	Type 2 diabetes || id:ebi-a-GCST005413	Weighted mode	15	0.682764	1.14 (0.61 to 2.14)
Malignant neoplasm of oesophagus (all cancers excluded) || id:finn-b-C3_OESOPHAGUS_EXALLC	Type 2 diabetes, strict (exclude DM1) || id:finn-b-E4_DM2_STRICT	MR Egger	43	0.168398	1.81 (0.79 to 4.14)
Malignant neoplasm of oesophagus (all cancers excluded) || id:finn-b-C3_OESOPHAGUS_EXALLC	Type 2 diabetes, strict (exclude DM1) || id:finn-b-E4_DM2_STRICT	Weighted median	43	0.204192	1.39 (0.83 to 2.32)
Malignant neoplasm of oesophagus (all cancers excluded) || id:finn-b-C3_OESOPHAGUS_EXALLC	Type 2 diabetes, strict (exclude DM1) || id:finn-b-E4_DM2_STRICT	Inverse variance weighted	43	0.00694977	1.57 (1.13 to 2.17)	0.688154	-0.0149683	0.714612
Malignant neoplasm of oesophagus (all cancers excluded) || id:finn-b-C3_OESOPHAGUS_EXALLC	Type 2 diabetes, strict (exclude DM1) || id:finn-b-E4_DM2_STRICT	Simple mode	43	0.302957	1.75 (0.61 to 5.03)
Malignant neoplasm of oesophagus (all cancers excluded) || id:finn-b-C3_OESOPHAGUS_EXALLC	Type 2 diabetes, strict (exclude DM1) || id:finn-b-E4_DM2_STRICT	Weighted mode	43	0.369624	1.37 (0.69 to 2.72)
Malignant neoplasm of stomach (all cancers excluded) || id:finn-b-C3_STOMACH_EXALLC	Type 2 diabetes || id:ebi-a-GCST005413	MR Egger	15	0.316465	0.73 (0.41 to 1.31)
Malignant neoplasm of stomach (all cancers excluded) || id:finn-b-C3_STOMACH_EXALLC	Type 2 diabetes || id:ebi-a-GCST005413	Weighted median	15	0.304186	0.86 (0.64 to 1.15)
Malignant neoplasm of stomach (all cancers excluded) || id:finn-b-C3_STOMACH_EXALLC	Type 2 diabetes || id:ebi-a-GCST005413	Inverse variance weighted	15	0.41992	0.91 (0.73 to 1.14)	0.947939	0.0366585	0.440453
Malignant neoplasm of stomach (all cancers excluded) || id:finn-b-C3_STOMACH_EXALLC	Type 2 diabetes || id:ebi-a-GCST005413	Simple mode	15	0.724594	1.10 (0.66 to 1.82)
Malignant neoplasm of stomach (all cancers excluded) || id:finn-b-C3_STOMACH_EXALLC	Type 2 diabetes || id:ebi-a-GCST005413	Weighted mode	15	0.276421	0.82 (0.58 to 1.16)
Malignant neoplasm of stomach (all cancers excluded) || id:finn-b-C3_STOMACH_EXALLC	Type 2 diabetes, strict (exclude DM1) || id:finn-b-E4_DM2_STRICT	MR Egger	43	0.233796	0.73 (0.44 to 1.21)
Malignant neoplasm of stomach (all cancers excluded) || id:finn-b-C3_STOMACH_EXALLC	Type 2 diabetes, strict (exclude DM1) || id:finn-b-E4_DM2_STRICT	Weighted median	43	0.62667	0.93 (0.68 to 1.26)
Malignant neoplasm of stomach (all cancers excluded) || id:finn-b-C3_STOMACH_EXALLC	Type 2 diabetes, strict (exclude DM1) || id:finn-b-E4_DM2_STRICT	Inverse variance weighted	43	0.799002	0.97 (0.80 to 1.19)	0.691905	0.029822	0.234919
Malignant neoplasm of stomach (all cancers excluded) || id:finn-b-C3_STOMACH_EXALLC	Type 2 diabetes, strict (exclude DM1) || id:finn-b-E4_DM2_STRICT	Simple mode	43	0.771647	1.09 (0.60 to 1.99)
Malignant neoplasm of stomach (all cancers excluded) || id:finn-b-C3_STOMACH_EXALLC	Type 2 diabetes, strict (exclude DM1) || id:finn-b-E4_DM2_STRICT	Weighted mode	43	0.449464	0.86 (0.58 to 1.27)
Colorectal cancer (all cancers excluded) || id:finn-b-C3_COLORECTAL_EXALLC	Type 2 diabetes || id:ebi-a-GCST005413	MR Egger	15	0.435582	0.87 (0.63 to 1.21)
Colorectal cancer (all cancers excluded) || id:finn-b-C3_COLORECTAL_EXALLC	Type 2 diabetes || id:ebi-a-GCST005413	Weighted median	15	0.350492	0.93 (0.80 to 1.08)
Colorectal cancer (all cancers excluded) || id:finn-b-C3_COLORECTAL_EXALLC	Type 2 diabetes || id:ebi-a-GCST005413	Inverse variance weighted	15	0.278481	0.94 (0.83 to 1.05)	0.178986	0.0113345	0.668373
Colorectal cancer (all cancers excluded) || id:finn-b-C3_COLORECTAL_EXALLC	Type 2 diabetes || id:ebi-a-GCST005413	Simple mode	15	0.773863	0.97 (0.77 to 1.21)
Colorectal cancer (all cancers excluded) || id:finn-b-C3_COLORECTAL_EXALLC	Type 2 diabetes || id:ebi-a-GCST005413	Weighted mode	15	0.403109	0.93 (0.79 to 1.09)
Colorectal cancer || id:ieu-b-4965	Type 2 diabetes || id:ebi-a-GCST005413	MR Egger	15	0.32299	1.00 (1.00 to 1.00)
Colorectal cancer || id:ieu-b-4965	Type 2 diabetes || id:ebi-a-GCST005413	Weighted median	15	0.427321	1.00 (1.00 to 1.00)
Colorectal cancer || id:ieu-b-4965	Type 2 diabetes || id:ebi-a-GCST005413	Inverse variance weighted	15	0.425685	1.00 (1.00 to 1.00)	0.849449	-0.000164243	0.452265
Colorectal cancer || id:ieu-b-4965	Type 2 diabetes || id:ebi-a-GCST005413	Simple mode	15	0.656786	1.00 (1.00 to 1.00)
Colorectal cancer || id:ieu-b-4965	Type 2 diabetes || id:ebi-a-GCST005413	Weighted mode	15	0.417409	1.00 (1.00 to 1.00)
Colorectal cancer (all cancers excluded) || id:finn-b-C3_COLORECTAL_EXALLC	Type 2 diabetes, strict (exclude DM1) || id:finn-b-E4_DM2_STRICT	MR Egger	43	0.0461204	0.78 (0.61 to 0.99)
Colorectal cancer (all cancers excluded) || id:finn-b-C3_COLORECTAL_EXALLC	Type 2 diabetes, strict (exclude DM1) || id:finn-b-E4_DM2_STRICT	Weighted median	43	0.521653	0.95 (0.82 to 1.11)
Colorectal cancer (all cancers excluded) || id:finn-b-C3_COLORECTAL_EXALLC	Type 2 diabetes, strict (exclude DM1) || id:finn-b-E4_DM2_STRICT	Inverse variance weighted	43	0.399733	0.96 (0.87 to 1.05)
Colorectal cancer (all cancers excluded) || id:finn-b-C3_COLORECTAL_EXALLC	Type 2 diabetes, strict (exclude DM1) || id:finn-b-E4_DM2_STRICT	Simple mode	43	0.927777	1.01 (0.76 to 1.35)
Colorectal cancer (all cancers excluded) || id:finn-b-C3_COLORECTAL_EXALLC	Type 2 diabetes, strict (exclude DM1) || id:finn-b-E4_DM2_STRICT	Weighted mode	43	0.612569	0.95 (0.79 to 1.15)	0.749005	0.0219389	0.0676942
Colorectal cancer || id:ieu-b-4965	Type 2 diabetes, strict (exclude DM1) || id:finn-b-E4_DM2_STRICT	MR Egger	39	0.307522	1.00 (1.00 to 1.00)
Colorectal cancer || id:ieu-b-4965	Type 2 diabetes, strict (exclude DM1) || id:finn-b-E4_DM2_STRICT	Weighted median	39	0.410639	1.00 (1.00 to 1.00)
Colorectal cancer || id:ieu-b-4965	Type 2 diabetes, strict (exclude DM1) || id:finn-b-E4_DM2_STRICT	Inverse variance weighted	39	0.72788	1.00 (1.00 to 1.00)	0.0849188	-0.000134284	0.333226
Colorectal cancer || id:ieu-b-4965	Type 2 diabetes, strict (exclude DM1) || id:finn-b-E4_DM2_STRICT	Simple mode	39	0.655167	1.00 (1.00 to 1.00)
Colorectal cancer || id:ieu-b-4965	Type 2 diabetes, strict (exclude DM1) || id:finn-b-E4_DM2_STRICT	Weighted mode	39	0.668166	1.00 (1.00 to 1.00)
Colorectal cancer || id:ieu-b-4965	Non-cancer illness code self-reported: type 2 diabetes || id:ukb-a-75	Wald ratio	1	0.429332	1.11 (0.85 to 1.45)
Liver cell carcinoma || id:ieu-b-4953	Type 2 diabetes || id:ebi-a-GCST005413	Inverse variance weighted (multiplicative random effects)	15	0.643907	1.00 (1.00 to 1.00)	0.0399354	-2.38e-05	0.647893
Liver cell carcinoma || id:ieu-b-4953	Type 2 diabetes, strict (exclude DM1) || id:finn-b-E4_DM2_STRICT	Inverse variance weighted (multiplicative random effects)	38	0.703625	1.00 (1.00 to 1.00)	1.6e-05	-5.85e-06	0.85718
Liver cell carcinoma || id:ieu-b-4953	Non-cancer illness code self-reported: type 2 diabetes || id:ukb-a-75	Wald ratio	1	0.627529	0.99 (0.94 to 1.04)
Malignant neoplasm of pancreas (all cancers excluded) || id:finn-b-C3_PANCREAS_EXALLC	Type 2 diabetes || id:ebi-a-GCST005413	MR Egger	15	0.443926	1.27 (0.70 to 2.32)
Malignant neoplasm of pancreas (all cancers excluded) || id:finn-b-C3_PANCREAS_EXALLC	Type 2 diabetes || id:ebi-a-GCST005413	Weighted median	15	0.48799	1.12 (0.82 to 1.52)
Malignant neoplasm of pancreas (all cancers excluded) || id:finn-b-C3_PANCREAS_EXALLC	Type 2 diabetes || id:ebi-a-GCST005413	Inverse variance weighted	15	0.570205	1.07 (0.85 to 1.34)	0.903245	-0.0293655	0.545264
Malignant neoplasm of pancreas (all cancers excluded) || id:finn-b-C3_PANCREAS_EXALLC	Type 2 diabetes || id:ebi-a-GCST005413	Simple mode	15	0.208403	0.71 (0.42 to 1.18)
Malignant neoplasm of pancreas (all cancers excluded) || id:finn-b-C3_PANCREAS_EXALLC	Type 2 diabetes || id:ebi-a-GCST005413	Weighted mode	15	0.371419	1.18 (0.83 to 1.70)
Pancreatic cancer || id:ieu-a-822	Type 2 diabetes || id:ebi-a-GCST005413	MR Egger	3	0.936563	1.70 (0.00 to 57675.21)
Pancreatic cancer || id:ieu-a-822	Type 2 diabetes || id:ebi-a-GCST005413	Weighted median	3	0.160724	1.53 (0.84 to 2.78)
Pancreatic cancer || id:ieu-a-822	Type 2 diabetes || id:ebi-a-GCST005413	Inverse variance weighted	3	0.058147	1.62 (0.98 to 2.65)	0.418574	-0.00669835	0.993739
Pancreatic cancer || id:ieu-a-822	Type 2 diabetes || id:ebi-a-GCST005413	Simple mode	3	0.448835	1.43 (0.68 to 3.00)
Pancreatic cancer || id:ieu-a-822	Type 2 diabetes || id:ebi-a-GCST005413	Weighted mode	3	0.412458	1.48 (0.70 to 3.10)
Malignant neoplasm of pancreas (all cancers excluded) || id:finn-b-C3_PANCREAS_EXALLC	Type 2 diabetes, strict (exclude DM1) || id:finn-b-E4_DM2_STRICT	MR Egger	43	0.812927	1.06 (0.64 to 1.79)
Malignant neoplasm of pancreas (all cancers excluded) || id:finn-b-C3_PANCREAS_EXALLC	Type 2 diabetes, strict (exclude DM1) || id:finn-b-E4_DM2_STRICT	Weighted median	43	0.469717	1.13 (0.81 to 1.58)
Malignant neoplasm of pancreas (all cancers excluded) || id:finn-b-C3_PANCREAS_EXALLC	Type 2 diabetes, strict (exclude DM1) || id:finn-b-E4_DM2_STRICT	Inverse variance weighted	43	0.924676	1.01 (0.82 to 1.24)	0.543833	-0.00554753	0.828035
Malignant neoplasm of pancreas (all cancers excluded) || id:finn-b-C3_PANCREAS_EXALLC	Type 2 diabetes, strict (exclude DM1) || id:finn-b-E4_DM2_STRICT	Simple mode	43	0.200202	1.51 (0.81 to 2.83)
Malignant neoplasm of pancreas (all cancers excluded) || id:finn-b-C3_PANCREAS_EXALLC	Type 2 diabetes, strict (exclude DM1) || id:finn-b-E4_DM2_STRICT	Weighted mode	43	0.34128	1.20 (0.83 to 1.73)

## Sheet: Supplemental Table 6
Supplemental Table 6. The Results of MR Steiger directionality test
Exposure	Outcome	snp_r2.exposure	snp_r2.outcome	Causal direction
Type 2 diabetes || id:ebi-a-GCST010118	hepatocellular carcinoma || id:bbj-a-158	1.9704e-05	3.34009e-08	TRUE
Type 2 diabetes || id:ebi-a-GCST010118	Esophageal cancer || id:bbj-a-117	1.9704e-05	3.11914e-08	TRUE
Type 2 diabetes || id:ebi-a-GCST010118	Gastric cancer || id:bbj-a-119	1.9704e-05	3.77487e-08	TRUE
Type 2 diabetes || id:ebi-a-GCST010118	Pancreatic cancer || id:bbj-a-140	1.9704e-05	1.2659e-08	TRUE
Type 2 diabetes || id:ebi-a-GCST010118	Colorectal cancer || id:bbj-a-107	1.9704e-05	2.00605e-08	TRUE
Type 2 Diabetes || id:bbj-a-77	Colorectal cancer || id:bbj-a-107	3.5201e-05	9.28067e-09	TRUE
Type 2 Diabetes || id:bbj-a-77	Esophageal cancer || id:bbj-a-117	3.5201e-05	1.68674e-08	TRUE
Type 2 Diabetes || id:bbj-a-77	Gastric cancer || id:bbj-a-119	3.5201e-05	3.54319e-08	TRUE
Type 2 Diabetes || id:bbj-a-77	Pancreatic cancer || id:bbj-a-140	3.5201e-05	5.90336e-09	TRUE
Type 2 Diabetes || id:bbj-a-77	hepatocellular carcinoma || id:bbj-a-158	3.5201e-05	2.34596e-08	TRUE
Type 2 diabetes || id:bbj-a-153	Colorectal cancer || id:bbj-a-107	3.34377e-05	1.07327e-08	TRUE
Type 2 diabetes || id:bbj-a-153	Esophageal cancer || id:bbj-a-117	3.34377e-05	2.10823e-08	TRUE
Type 2 diabetes || id:bbj-a-153	Gastric cancer || id:bbj-a-119	3.34377e-05	2.33346e-08	TRUE
Type 2 diabetes || id:bbj-a-153	Pancreatic cancer || id:bbj-a-140	3.34377e-05	6.44829e-09	TRUE
Type 2 diabetes || id:bbj-a-153	hepatocellular carcinoma || id:bbj-a-158	3.34377e-05	2.50923e-08	TRUE
Fasting insulin || id:ebi-a-GCST90002237	Esophageal cancer || id:bbj-a-117	2.32612e-06	2.26613e-10	TRUE
Hemoglobin A1c || id:bbj-a-26	Colorectal cancer || id:bbj-a-107	6.01607e-05	1.4415e-08	TRUE
Hemoglobin A1c || id:bbj-a-26	Gastric cancer || id:bbj-a-119	6.01607e-05	1.44424e-08	TRUE
Hemoglobin A1c || id:bbj-a-26	Pancreatic cancer || id:bbj-a-140	6.01607e-05	1.93526e-09	TRUE

## Sheet: Supplemental Table 7
Supplemental Table 7. The results of MR and Multivariable of T2DM and HCC adjusted for Chronic hepatitis C infection and Cirrhosis
MR Method	No.SNP	P value	OR (95% CI)	Q-statistics	P h	Egger intercept	P intercept
Chronic hepatitis C infection-HCC
Inverse variance weighted	2	<0.001	3.15 (2.31 to 4.31)	0.0684032	0.793676
Maximum likelihood	2	<0.001	3.16 (2.19 to 4.54)
Chronic hepatitis C infection-T2DM
Inverse variance weighted	2	0.265	1.04 (0.97 to 1.13)	1.34494	0.246164
Maximum likelihood	2	0.196	1.04 (0.98 to 1.12)
Multivariable Mendelian Randomization
T2DM-HCC	99	0.783	0.99 (0.89 to 1.09)
Chronic hepatitis C infection-HCC	1	<0.001	2.15 (1.67 to 2.76)
Cirrhosis-HCC
MR Egger	5	0.127	5.76 (1.12 to 29.70)	2.64516	0.449627	-0.198511	0.324265
Weighted median	5	<0.001	2.21 (1.77 to 2.77)
Inverse variance weighted	5	<0.001	2.16 (1.85 to 2.53)	4.0292	0.402068
Maximum likelihood	5	<0.001	2.19 (1.81 to 2.64)
MR-PRESSO	5	0.001	2.16 (1.39 to 3.37)
Cirrhosis-T2DM
MR Egger	5	0.681	1.34 (0.38 to 4.81)	41.6025	<0.001	-0.0500909	0.728171
Weighted median	5	0.024	1.07 (1.01 to 1.14)
Inverse variance weighted	5	0.387	1.05 (0.94 to 1.17)	43.6221	<0.001
Maximum likelihood	5	0.002	1.06 (1.02 to 1.10)
MR-PRESSO	2	0.07	1.10 (0.99 to 1.23)
Multivariable Mendelian Randomization
T2DM-HCC	99	0.296	0.95 (0.88 to 1.04)
Cirrhosis-HCC	1	<0.001	2.02 (1.72 to 2.38)
Multivariable Mendelian Randomization
T2DM-HCC	99	0.985	1.00 (0.91 to 1.10)
Chronic hepatitis C infection-HCC	1	0.026	1.37 (1.04 to 1.81)
Cirrhosis-HCC	1	<0.001	2.04 (1.67 to 2.50)

## Sheet: Supplemental Table 8
Supplemental Table 8. The results of MR and Multivariable of T2DM and Digestive System Tumors adjusted for smoking status, BMI, and Alcohol intake frequency
MR Method	No.SNP	OR (95% CI)	P value	Q_pval	F-statistic of T2DM	F-statistic of modified factor
smoking status adjusted
T2DM-Colorectal cancer	107	0.89 (0.84 to 0.93)	<0.001	0.131463	58.223	1.81915
T2DM-Esophageal cancer	107	0.78 (0.68 to 0.90)	<0.001	<0.001	58.223	1.81915
T2DM-Gastric cancer	107	0.88 (0.82 to 0.93)	<0.001	0.00100967	58.223	1.81915
T2DM-Pancreatic cancer	107	1.17 (0.95 to 1.44)	0.133	0.0987237	58.223	1.81915
T2DM-hepatocellular carcinoma	107	0.89 (0.80 to 0.99)	0.025	0.0728867	58.223	1.81915
BMI adjusted
T2DM-Colorectal cancer	94	0.90 (0.85 to 0.95)	<0.001	0.122236	57.4661	24.3788
T2DM-Esophageal cancer	94	0.79 (0.66 to 0.94)	<0.001	<0.001	57.4661	24.3788
T2DM-Gastric cancer	94	0.88 (0.82 to 0.95)	<0.001	<0.001	57.4661	24.3788
T2DM-Pancreatic cancer	94	1.16 (0.93 to 1.45)	0.177	0.0662047	57.4661	24.3788
T2DM-hepatocellular carcinoma	94	0.89 (0.79 to 0.99)	0.026	0.0798115	57.4661	24.3788
Alcohol intake frequency adjusted
T2DM-Colorectal cancer	107	0.89 (0.84 to 0.94)	<0.001	0.131463	58.223	1.81915
T2DM-Esophageal cancer	107	0.78 (0.67 to 0.90)	<0.001	<0.001	58.223	1.81915
T2DM-Gastric cancer	107	0.87 (0.82 to 0.92)	<0.001	0.00100967	58.223	1.81915
T2DM-Pancreatic cancer	107	1.20 (0.97 to 1.47)	0.086	0.0987237	58.223	1.81915
T2DM-hepatocellular carcinoma	107	0.89 (0.80 to 0.99)	0.026	0.131463	58.223	1.81915
